# Supplementary material for: Optimal ATN biomarkers and their role in predicting cognitive progress of mild cognitive impairment
Source: Research Square preprint supplement (doi:10.21203/rs.3.rs-201708/v1), 2021-02-18
Supplement: Supplementary file 1 [file 43b0387ca762abcdc01577bd.docx]

**Additional file 3. The frequency of different ATN profiles in HC, MCI and AD groups**
